# Supplementary material for: Surface thermodynamics of yttrium titanate pyrochlore nanomaterials
Source: Royal Society of Chemistry journal article supplement (doi:10.1039/d3nr05605h), 2024-01-01
Supplement: d3nr05605h1.pdf [file d3nr05605h1.pdf]

## Supplemental Information for Surface Thermodynamics of Yttrium Titanate Pyrochlore Nanomaterials

Margaret E. Reece,<sup>a,b</sup> Jiahong Li,<sup>a</sup> Andrew C. Strzelecki,<sup>b</sup> Juan Wen,<sup>d</sup> Qiang Zhang,<sup>a</sup> and Xiaofeng Guo<sup>a,c,\*</sup>

<sup>a</sup>Department of Chemistry, Washington State University, Pullman WA 99164, United States

<sup>b</sup>Earth and Environmental Sciences Division, Los Alamos National Laboratory, Los Alamos New Mexico 87545, United States

<sup>c</sup>The School of Mechanical and Materials Engineering, Washington State University, Pullman WA 99164, United States

<sup>d</sup>School of Materials and Energy, Lanzhou University, Lanzhou Gansu 730000, China

\*corresponding author; email [x.guo@wsu.edu](mailto:x.guo@wsu.edu)

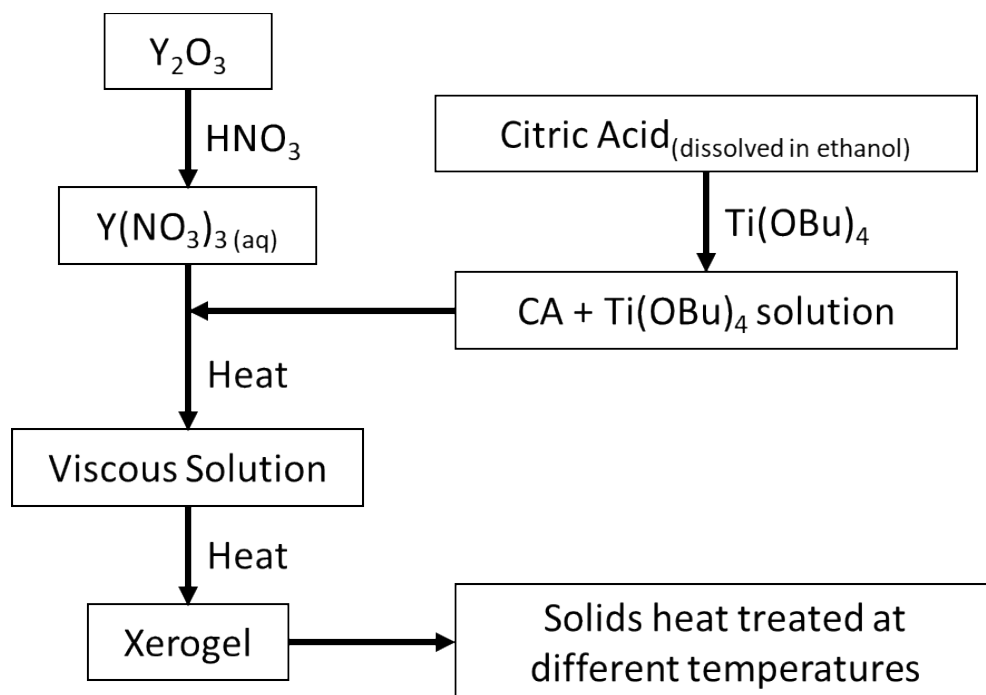

Figure S1. Diagram illustrating the sol-gel synthesis route of as-prepared  $Y_2Ti_2O_7$  nanoparticles.

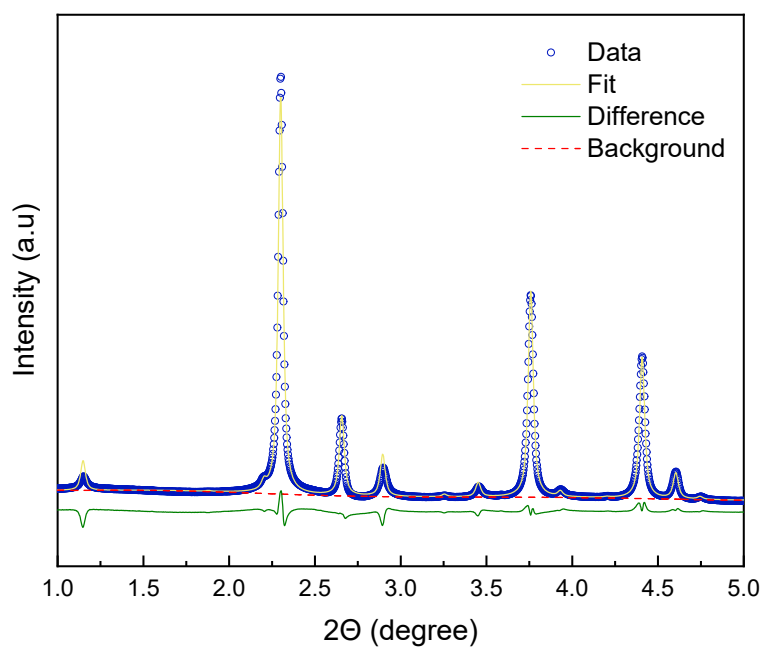

Figure S2. Representative fit of synchrotron XRD pattern of 31 nm sized  $Y_2Ti_2O_7$ .

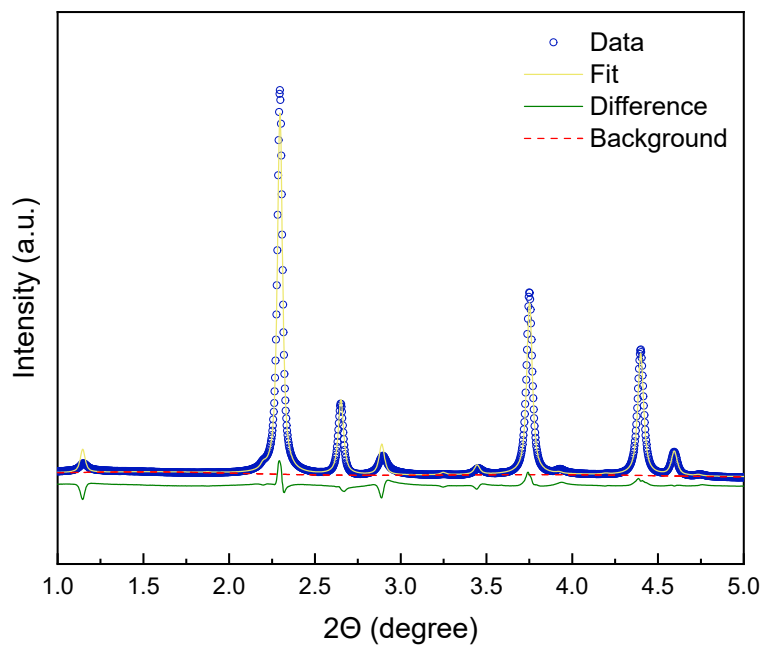

Figure S3. Representative fit of synchrotron XRD pattern of 35 nm sized  $Y_2Ti_2O_7$ .

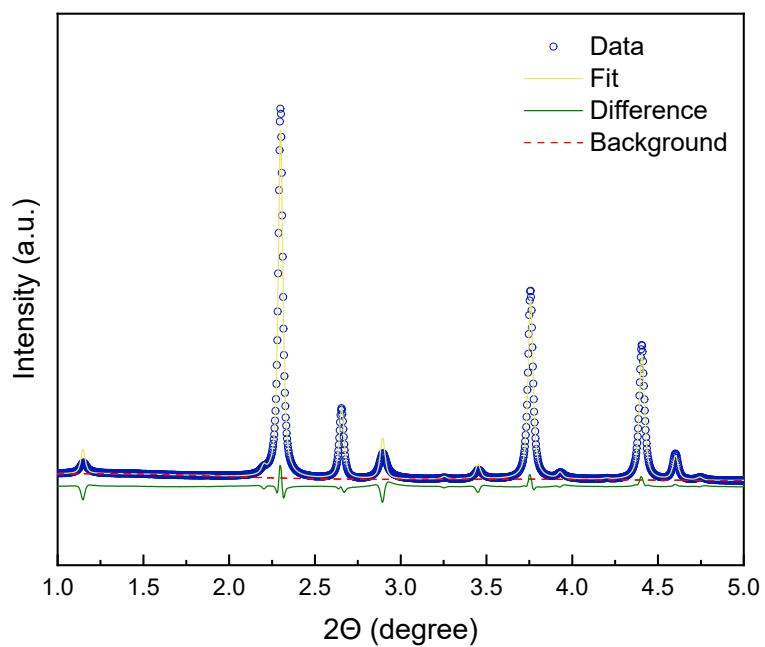

Figure S4. Representative fit of synchrotron XRD pattern of 42 nm sized  $Y_2Ti_2O_7$ .

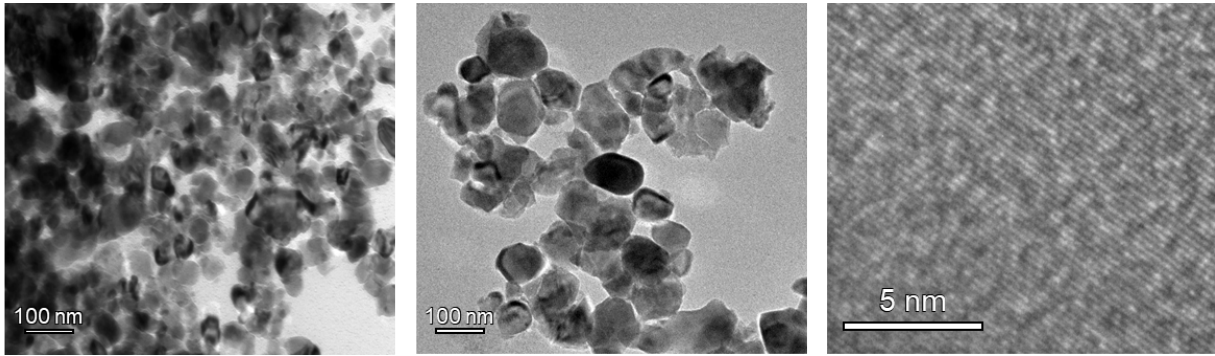

Figure S5. TEM images of the 34 nm (left) and 131 nm (center) nanoparticles and HRTEM of the 131 nm (right) material.

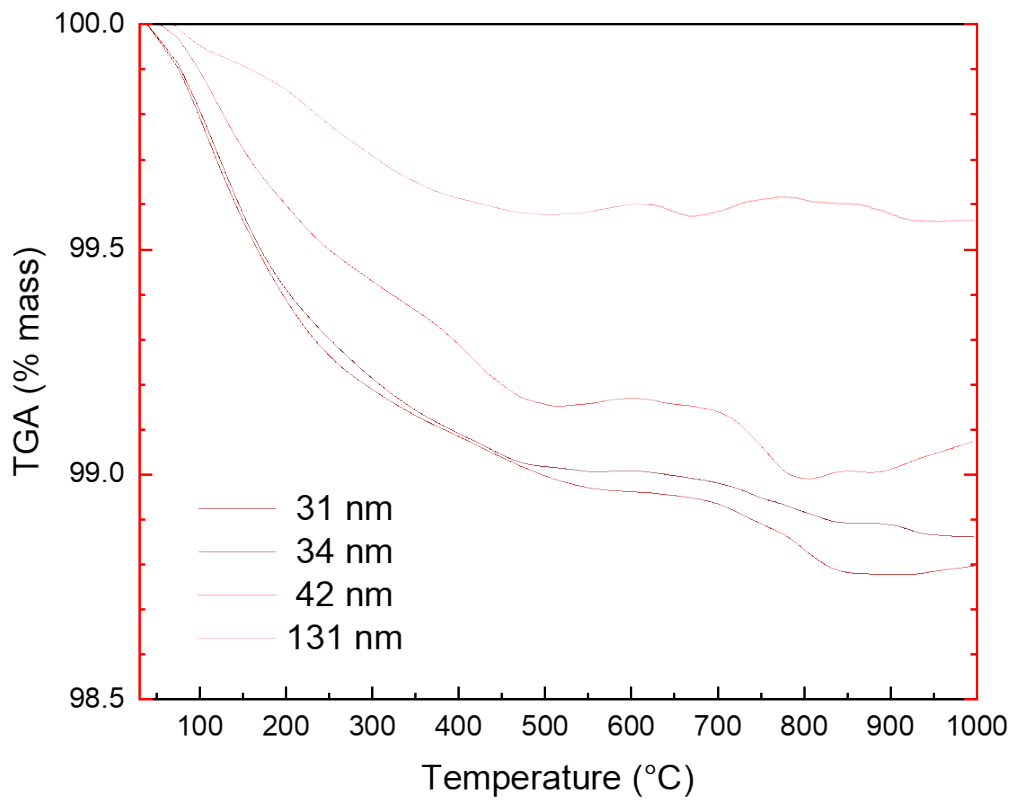

Figure S6. TGA curves under a flowing N<sub>2</sub> atmosphere. Color lightens as the particle diameter increases.

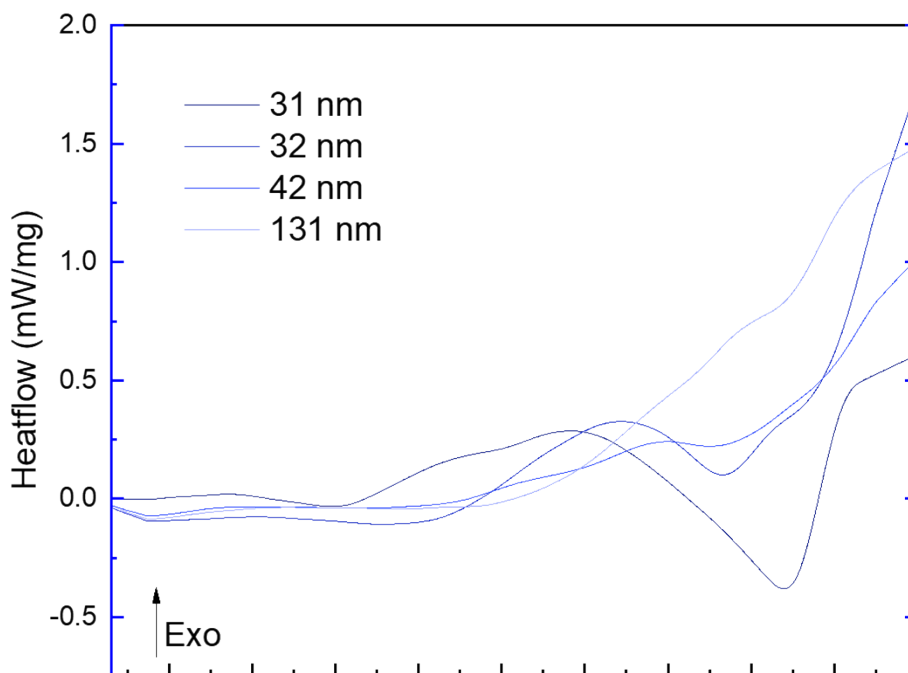

Figure S7. DSC curves under a flowing N<sub>2</sub> atmosphere. Color lightens as the particle diameter increases.

Table S1. Experimentally determined enthalpy of drop solution ( $\Delta H_{ds}$ ), corrected enthalpy of drop solution ( $\Delta H_{ds}'$ ), enthalpy of formation from the oxides ( $\Delta H_{f,ox}$ ) and standard enthalpy of formation ( $\Delta H_f^\circ$ ) for all pyrochlore samples following the thermochemical cycle in Table 2.

| Y <sub>2</sub> Ti <sub>2</sub> O <sub>7</sub><br>Sample | $\Delta H_{ds}$ (kJ/mol)                                | Corrected $\Delta H_{ds}'$<br>(kJ/mol) | $\Delta H_{f,ox}$ (kJ/mol) | $\Delta H_f^\circ$ (kJ/mol) |
|---------------------------------------------------------|---------------------------------------------------------|----------------------------------------|----------------------------|-----------------------------|
| 30.83                                                   | 62.65 <sup>†</sup> ± 0.41 <sup>‡</sup> (5) <sup>§</sup> | 38.92 ± 0.41                           | -38.04 ± 0.47              | -3858.84 ± 5.46             |
| 34.74                                                   | 56.72 ± 0.57 (3)                                        | 32.99 ± 0.57                           | -32.11 ± 0.61              | -3852.91 ± 5.46             |
| 41.56                                                   | 68.17 ± 1.29 (4)                                        | 47.83 ± 1.29                           | -46.95 ± 1.31              | -3867.75 ± 5.60             |
| 131.4                                                   | 78.79 ± 1.92 (4)                                        | 67.49 ± 1.92                           | -66.61 ± 1.94              | -3887.41 ± 5.78             |

<sup>†</sup>Average. <sup>‡</sup>Two standard deviations of the average. <sup>§</sup>Number of measurements.

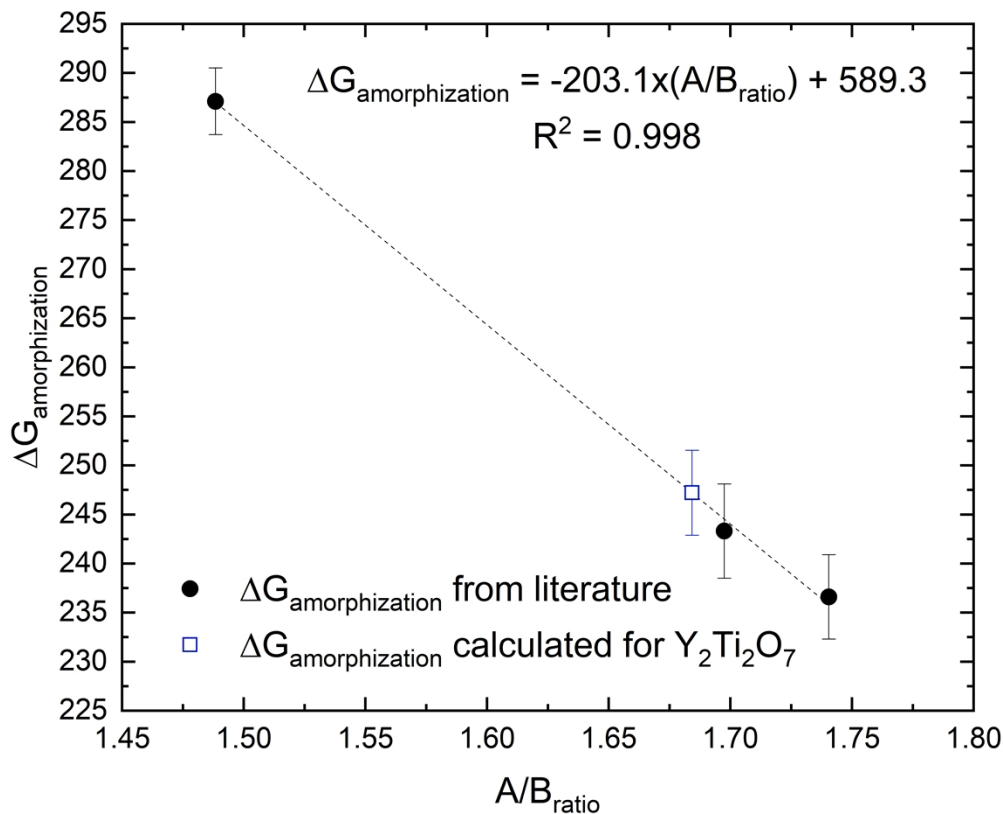

Figure S8. Linear fit of  $\Delta G_{\text{amarphization}}$  energies of reported pyrochlore compounds<sup>1–3</sup> (black circles) in relation to A/B cationic radii ratio<sup>4</sup>. This fit was used to estimate a value of  $\Delta G_{\text{amarphization}}$  of  $\text{Y}_2\text{Ti}_2\text{O}_7$  (blue square).

## References

- (1) Chung, C. K.; Lang, M.; Xu, H.; Navrotsky, A. Thermodynamics of Radiation Induced Amorphization and Thermal Annealing of  $\text{Dy}_2\text{Sn}_2\text{O}_7$  Pyrochlore. *Acta Mater* **2018**, *155*, 386–392. <https://doi.org/10.1016/j.actamat.2018.06.003>.
- (2) Chung, C. K.; Shamblin, J.; O’Quinn, E. C.; Shelyug, A.; Gussev, I.; Lang, M.; Navrotsky, A. Thermodynamic and Structural Evolution of  $\text{Dy}_2\text{Ti}_2\text{O}_7$  Pyrochlore after Swift Heavy Ion Irradiation. *Acta Mater* **2018**, *145*, 227–234. <https://doi.org/10.1016/j.actamat.2017.12.044>.
- (3) Chung, C. K.; O’Quinn, E. C.; Neufeind, J. C.; Fuentes, A. F.; Xu, H.; Lang, M.; Navrotsky, A. Thermodynamic and Structural Evolution of Mechanically Milled and Swift Heavy Ion Irradiated  $\text{Er}_2\text{Ti}_2\text{O}_7$  Pyrochlore. *Acta Mater* **2019**, *181*. <https://doi.org/10.1016/j.actamat.2019.09.022>.

- (4) Shannon, R. D. Revised Effective Ionic Radii and Systematic Studies of Interatomic Distances in Halides and Chalcogenides. *Acta Crystallographica Section A* **1976**, *32* (5).  
<https://doi.org/10.1107/S0567739476001551>.
